# Supplementary material
Source: HighWire-hosted journal article supplement (https://care.diabetesjournals.org/content/suppl/2007/10/17/dc07-1616)

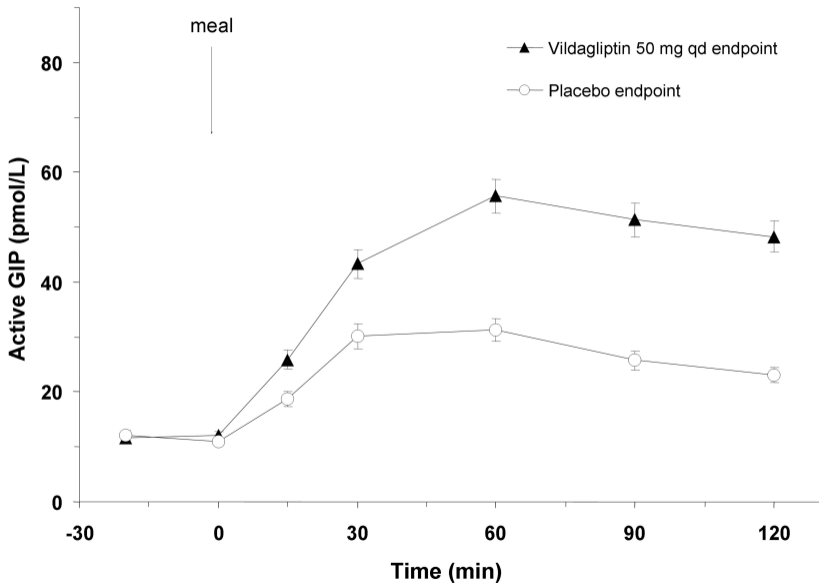

Supplement: DC071616OnlineAppendixFigure2.pdf [file DC071616OnlineAppendixFigure2.pdf]
